# Supplementary material for: Using GRACE in a streamflow recession to determine drainable water storage in the Mississippi River Basin
Source: Copernicus journal article supplement (doi:10.5194/hess-2019-65), 2019-02-07
Supplement: Supplementary file 1 [file hess-2019-65-supplement.pdf]

Supporting Information for  
**Using GRACE in a streamflow recession to determine drainable water storage in the  
Mississippi River Basin**

**H. E. Macedo<sup>1,2</sup>, R. E. Beighley<sup>2</sup>, C. H. David<sup>3</sup>, and J. T. Reager<sup>3</sup>**

<sup>1</sup>Geography Department, McGill University, Montreal, Quebec, Canada

<sup>2</sup>Civil and Environmental Engineering Department, Northeastern University, Boston, Massachusetts, USA

<sup>3</sup>NASA Jet Propulsion Laboratory, California Institute of Technology, Pasadena, California, USA

### **Contents of this file**

Tables S1 and S2

### **Introduction**

This document offers the supporting information for our manuscript. Table S1 includes the  $\alpha$  and  $\beta$  parameters for all 12 stations, which can be seen at Figure 3. Table S2 lists the storage offsets used to convert GRACE TWSA into absolute drainable storage values, used to create Figure 4.

**Table S1.** Resulting storage-discharge coefficients for overall discharge and baseflow with associated  $R^2$  values.

| <b>ID</b> | <b><math>\alpha_o</math></b> | <b><math>\beta_o</math></b> | <b><math>R^2</math></b> | <b><math>\alpha_b</math></b> | <b><math>\beta_b</math></b> | <b><math>R^2</math></b> |
|-----------|------------------------------|-----------------------------|-------------------------|------------------------------|-----------------------------|-------------------------|
| <b>1</b>  | 2.7230                       | 0.1048                      | 0.78                    | 1.4223                       | 0.0876                      | 0.85                    |
| <b>2</b>  | 2.4810                       | 0.1108                      | 0.80                    | 1.3029                       | 0.1022                      | 0.88                    |
| <b>3</b>  | 2.7214                       | 0.0759                      | 0.75                    | 1.5374                       | 0.0761                      | 0.92                    |
| <b>4</b>  | 1.8031                       | 0.0875                      | 0.59                    | 1.1570                       | 0.0781                      | 0.88                    |
| <b>5</b>  | 1.8557                       | 0.0999                      | 0.66                    | 1.2188                       | 0.1066                      | 0.91                    |
| <b>6</b>  | 1.9825                       | 0.0992                      | 0.74                    | 1.2844                       | 0.1055                      | 0.91                    |
| <b>7</b>  | 0.2209                       | 0.0511                      | 0.46                    | 0.1534                       | 0.0319                      | 0.72                    |
| <b>8</b>  | 0.2616                       | 0.0466                      | 0.40                    | 0.1834                       | 0.0162                      | 0.46                    |
| <b>9</b>  | 0.2848                       | 0.0441                      | 0.45                    | 0.2133                       | 0.0184                      | 0.71                    |
| <b>10</b> | 0.2854                       | 0.0508                      | 0.51                    | 0.2142                       | 0.0248                      | 0.91                    |
| <b>11</b> | 0.4224                       | 0.0691                      | 0.54                    | 0.2659                       | 0.0358                      | 0.90                    |
| <b>12</b> | 1.1009                       | 0.0830                      | 0.80                    | 0.8299                       | 0.0914                      | 0.92                    |

**Table S2.** Storage offsets ( $S_o$ ) for near zero flow conditions of 0.01% and 0.1% of the minimum non-winter monthly discharge ( $Q_{\min}$ ) observed during the period of study and maximum and minimum basin-average GRACE TWSA observed during the period of study.

| <b>ID</b> | <b><math>S_o</math><br/>(0.1%<math>Q_{\min}</math>)</b> | <b><math>S_o</math><br/>(0.01%<math>Q_{\min}</math>)</b> | <b>TWSA<sub>max</sub></b> | <b>TWSA<sub>min</sub></b> |
|-----------|---------------------------------------------------------|----------------------------------------------------------|---------------------------|---------------------------|
| <b>1</b>  | 84                                                      | 106                                                      | 12.5                      | -18.0                     |
| <b>2</b>  | 79                                                      | 100                                                      | 14.0                      | -17.9                     |
| <b>3</b>  | 114                                                     | 145                                                      | 15.2                      | -20.5                     |
| <b>4</b>  | 93                                                      | 119                                                      | 10.7                      | -14.0                     |
| <b>5</b>  | 84                                                      | 107                                                      | 10.9                      | -13.8                     |
| <b>6</b>  | 84                                                      | 108                                                      | 12.6                      | -14.4                     |
| <b>7</b>  | 145                                                     | 190                                                      | 18.9                      | -7.9                      |
| <b>8</b>  | 158                                                     | 207                                                      | 20.8                      | -7.2                      |
| <b>9</b>  | 168                                                     | 220                                                      | 21.3                      | -7.6                      |
| <b>10</b> | 146                                                     | 191                                                      | 20.1                      | -8.1                      |
| <b>11</b> | 111                                                     | 144                                                      | 18.4                      | -7.7                      |
| <b>12</b> | 96                                                      | 123                                                      | 14.6                      | -9.7                      |
